# Supplementary material for: Influence of the Addition of Extruded Endogenous Tartary Buckwheat Starch on Processing and Quality of Gluten-Free Noodles
Source: MDPI journal article supplement (doi:10.3390/foods10112693), 2021-11-04
Supplement: s1 [file s1]

Supplementary Materials

| Supplementary Table S1 Drying procedure for gluten-free <i>Tartary</i> buckwheat noodles |               |                     |                 |                         |                               |                                       |
|------------------------------------------------------------------------------------------|---------------|---------------------|-----------------|-------------------------|-------------------------------|---------------------------------------|
| Step<br>s                                                                                | Time<br>(min) | Temperature<br>(°C) | Humidity<br>(%) | Cycle frequency<br>(Hz) | Stirring<br>Frequency<br>(Hz) | Remove-<br>water<br>Frequency<br>(Hz) |
| 1                                                                                        | 5             | 35                  | 85              | 35                      | 25                            | 15                                    |
| 2                                                                                        | 25            | 35                  | 85              | 35                      | 25                            | 15                                    |
| 3                                                                                        | 5             | 40                  | 80              | 35                      | 25                            | 15                                    |
| 4                                                                                        | 30            | 40                  | 80              | 35                      | 25                            | 15                                    |
| 5                                                                                        | 5             | 45                  | 75              | 35                      | 25                            | 15                                    |
| 6                                                                                        | 50            | 45                  | 75              | 35                      | 25                            | 15                                    |
| 7                                                                                        | 5             | 40                  | 70              | 35                      | 25                            | 15                                    |
| 8                                                                                        | 15            | 40                  | 70              | 35                      | 25                            | 15                                    |
| 9                                                                                        | 10            | 30                  | 60              | 35                      | 25                            | 15                                    |
| 10                                                                                       | 20            | 30                  | 60              | 35                      | 25                            | 15                                    |

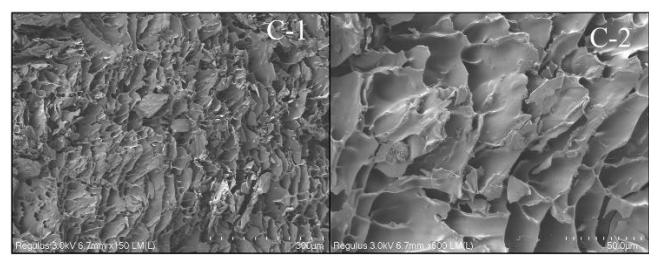

Supplementary Figure S1 Microstructure of 15% extruded starch gel.
